# Supplementary material
Source: PubMed Central journal article supplement (PMC5478998)
Supplement: AEM.00489-17_zam999117916s1.pdf [file AEM.00489-17_zam999117916s1.pdf]

**TABLE S1. *B. burgdorferi* sl detected at different collection sites of Austria**

| Province      | Collection site              | pos. Ticks | Bbss | Bg/Bbav | Ba | Bsp | Bl | Bv | Co-infections <sup>a</sup> |
|---------------|------------------------------|------------|------|---------|----|-----|----|----|----------------------------|
| Styria        |                              | 17/62      | 4    | 2       | 11 | -   | -  | 4  | 4                          |
|               | Mürzzuschlag (Mz)            | 9/32       | 2    | 1       | 6  | -   | -  | 2  | 2                          |
|               | Admont (Ad)                  | 8/30       | 2    | 1       | 5  | -   | -  | 2  | 2                          |
| Salzburg      |                              | 16/64      | 1    | 2       | 12 | -   | 1  | 3  | 3                          |
|               | Golgeg (G)                   | 4/20       | -    | -       | 2  | -   | -  | 1  | -                          |
|               | Adnet (A)                    | 3/20       | -    | 1       | 2  | -   | -  | -  | -                          |
|               | Neufahrn (N)                 | 9/22       | 1    | 1       | 8  | -   | 1  | 2  | 3                          |
| Lower Austria |                              | 12/64      | 3    | 2       | 4  | -   | 3  | 3  | 3                          |
|               | Hüttendorf (Hd)              | 2/12       | -    | 1       | -  | -   | -  | 1  | -                          |
|               | St.Pölten (SP)               | 3/13       | 1    | -       | 3  | -   | -  | -  | 1                          |
|               | Irnfritz (Ir)                | 3/14       | 2    | -       | 1  | -   | -  | 1  | 1                          |
|               | Ebreichsdorf (E)             | 3/13       | -    | -       | -  | -   | 3  | 1  | 1                          |
|               | Wolfenreith (W)              | 1/12       | -    | 1       | -  | -   | -  | -  | -                          |
| Burgenland    |                              | 14/60      | 1    | 3       | 11 | -   | -  | 2  | 2                          |
|               | Stoob (St)                   | 6/20       | 1    | 3       | 5  | -   | -  | -  | 2                          |
|               | Oberwart (O)                 | 3/20       | -    | -       | 2  | -   | -  | 1  | -                          |
|               | Breitenbrunn (B)             | 5/20       | -    | -       | 4  | -   | -  | 1  | -                          |
| Vorarlberg    |                              | 21/62      | 8    | 4       | 12 | 1   | -  | 3  | 7                          |
|               | Weiler (W)                   | 6/21       | 3    | -       | 2  | -   | -  | 1  | -                          |
|               | Klaus (K)                    | 11/21      | 4    | 3       | 7  | -   | -  | 2  | 5                          |
|               | Thüringen (T)                | 4/20       | 1    | 1       | 3  | 1   | -  | -  | 2                          |
| Tyrol         |                              | 17/61      | 6    | 5       | 11 | -   | 1  | 4  | 6                          |
|               | Imst (Im)                    | 6/20       | 1    | 1       | 4  | -   | 1  | 3  | 2                          |
|               | Mils (M)                     | 8/21       | 4    | 4       | 5  | -   | -  | 1  | 4                          |
|               | Fügen (F)                    | 3/20       | 1    | -       | 2  | -   | -  | -  | -                          |
| Upper Austria |                              | 17/60      | 6    | 5       | 8  | -   | -  | 6  | 7                          |
|               | Dietachdorf (Di)             | 8/20       | 3    | 3       | 4  | -   | -  | 2  | 3                          |
|               | Stallhofen (S)               | 5/20       | 2    | 1       | 3  | -   | -  | 2  | 3                          |
|               | Niederrottenheim (No)        | 4/20       | 1    | 1       | 1  | -   | -  | 2  | 1                          |
| Carinthia     |                              | 12/63      | 4    | -       | 7  | -   | -  | 6  | 4                          |
|               | Molzbichl (Mo)               | 4/20       | -    | -       | 3  | -   | -  | 1  | -                          |
|               | Drobollach am Faakersee (Dr) | 4/22       | 2    | -       | 2  | -   | -  | 2  | 1                          |
|               | St.Paul im Lavantal (SPL)    | 4/21       | 2    | -       | 2  | -   | -  | 3  | 3                          |
| Vienna        |                              | 16/60      | 5    | 5       | 4  | -   | -  | 5  | 3                          |
|               | Prater/Lusthaus (P)          | 5/30       | 4    | -       | 1  | -   | -  | -  | -                          |
|               | Lainzer Tiergarten (L)       | 11/30      | 1    | 5       | 3  | -   | -  | 5  | 3                          |

<sup>a</sup> multiple *B. burgdorferi* sl genospecies detected in a single tick

Abbreviations: Bbss, *B. burgdorferi sensu stricto*; Bg/Bbav, *B. garinii/B. bavariensis*; Ba, *B.*

*afzelii*; Bsp, *B. spielmanii*; Blus, *B. lusitaniae*; Bv, *B. valaisiana*;

**TABLE S2. *Rickettsia* spp. detected at different collection sites of Austria**

| Province      | Collection site              | pos.<br>Ticks | Rh | Rr | Rm | Rs | Rick. spp.     |
|---------------|------------------------------|---------------|----|----|----|----|----------------|
| Styria        |                              | 7/62          | 5  | 1  | -  | -  | 1              |
|               | Mürzzuschlag (Mz)            | 4/32          | 2  | 1  | -  | -  | 1              |
|               | Admont (Ad)                  | 3/30          | 3  | -  | -  | -  | -              |
| Salzburg      |                              | 7/62          | 7  | -  | -  | -  | -              |
|               | Golgeg (G)                   | 3/20          | 3  | -  | -  | -  | -              |
|               | Adnet (A)                    | -/20          | -  | -  | -  | -  | -              |
|               | Neufahrn (N)                 | 4/22          | 4  | -  | -  | -  | -              |
| Lower Austria |                              | 12/64         | 2  | 8  | -  | -  | 2              |
|               | Hüttendorf (Hd)              | 2/12          | -  | 1  | -  | -  | 1              |
|               | St.Pölten (SP)               | -/13          | -  | -  | -  | -  | -              |
|               | Irnfritz (Ir)                | 1/14          | 1  | -  | -  | -  | -              |
|               | Ebreichsdorf (E)             | 1/13          | 1  | -  | -  | -  | -              |
|               | Wolfenreith (W)              | 8/12          | -  | 7  | -  | -  | 1              |
| Burgenland    |                              | 4/60          | 1  | -  | -  | -  | 3              |
|               | Stoob (St)                   | -/20          | -  | -  | -  | -  | -              |
|               | Oberwart (O)                 | 3/20          | 1  | -  | -  | -  | 2              |
|               | Breitenbrunn (B)             | 1/20          | -  | -  | -  | -  | 1              |
| Vorarlberg    |                              | 9/62          | 7  | -  | -  | 1  | 1              |
|               | Weiler (W)                   | 4/21          | 3  | -  | -  | -  | -              |
|               | Klaus (K)                    | 1/21          | 1  | -  | -  | -  | -              |
|               | Thüringen (T)                | 4/20          | 3  | -  | -  | 1  | 1              |
| Tyrol         |                              | 3/61          | 3  | -  | -  | -  | -              |
|               | Imst (Im)                    | 2/20          | 2  | -  | -  | -  | -              |
|               | Mils (M)                     | -/21          | -  | -  | -  | -  | -              |
|               | Fügen (F)                    | 1/20          | 1  | -  | -  | -  | -              |
| Upper Austria |                              | 6/60          | 4  | 1  | -  | -  | 1              |
|               | Dietachdorf (Di)             | -/20          | -  | -  | -  | -  | -              |
|               | Stallhofen (S)               | 3/20          | 2  | 1  | -  | -  | -              |
|               | Niederrottenheim (No)        | 3/20          | 2  | -  | -  | -  | 1 <sup>a</sup> |
| Carinthia     |                              | 15/63         | 7  | 4  | -  | -  | 4              |
|               | Molzbichl (Mo)               | 7/20          | 4  | 2  | -  | -  | 1              |
|               | Drobollach am Faakersee (Dr) | 4/22          | 2  | 2  | -  | -  | -              |
|               | St.Paul im Lavantal (SPL)    | 4/21          | 1  | -  | -  | -  | 3              |
| Vienna        |                              | 30/60         | 3  | 24 | 2  | -  | 1              |
|               | Prater/Lusthaus (P)          | 8/30          | 2  | 4  | 2  | -  | -              |
|               | Lainzer Tiergarten (L)       | 22/30         | 1  | 20 | -  | -  | 1              |

<sup>a</sup> *Rickettsia* spp. not belonging to the SFG Rickettsiae

Abbreviations: Rh, *R. helvetica*; Rr, *R. raoultii*; Rm, *R. monacensis*; Rs, *R. slovacica*; Rick.

Spp., *Rickettsia* spp. not further identified

**TABLE S3. *Babesia* spp. detected at different collection sites of Austria**

| Province      | Collection site              | pos. Ticks | Bm | Bd | Bve |
|---------------|------------------------------|------------|----|----|-----|
| Styria        |                              | 1/62       | -  | -  | 1   |
|               | Mürzzuschlag (Mz)            | -/32       | -  | -  | -   |
|               | Admont (Ad)                  | 1/30       | -  | -  | 1   |
| Salzburg      |                              | 2/62       | -  | -  | 2   |
|               | Golgeg (G)                   | -/20       | -  | -  | -   |
|               | Adnet (A)                    | 1/20       | -  | -  | 1   |
|               | Neufahrn (N)                 | 1/22       | -  | -  | 1   |
| Lower Austria |                              | 1/64       | -  | 1  | -   |
|               | Hüttendorf (Hd)              | -/12       | -  | -  | -   |
|               | St.Pölten (SP)               | -/13       | -  | -  | -   |
|               | Irnfritz (Ir)                | -/14       | -  | -  | -   |
|               | Ebreichsdorf (E)             | 1/13       | -  | 1  | -   |
|               | Wolfenreith (W)              | -/12       | -  | -  | -   |
| Burgenland    |                              | -/60       | -  | -  | -   |
|               | Stoob (St)                   | -/20       | -  | -  | -   |
|               | Oberwart (O)                 | -/20       | -  | -  | -   |
|               | Breitenbrunn (B)             | -/20       | -  | -  | -   |
| Vorarlberg    |                              | 3/62       | 1  | 1  | 1   |
|               | Weiler (W)                   | -/21       | -  | -  | -   |
|               | Klaus (K)                    | 2/21       | 1  | -  | 1   |
|               | Thüringen (T)                | 1/20       | -  | 1  | -   |
| Tyrol         |                              | 2/61       | -  | 2  | -   |
|               | Imst (Im)                    | 2/20       | -  | 2  | -   |
|               | Mils (M)                     | -/21       | -  | -  | -   |
|               | Fügen (F)                    | -/20       | -  | -  | -   |
| Upper Austria |                              | 2/60       | 1  | -  | 1   |
|               | Dietachdorf (Di)             | -/20       | -  | -  | -   |
|               | Stallhofen (S)               | 1/20       | 1  | -  | -   |
|               | Niederrottenheim (No)        | 1/20       | -  | -  | 1   |
| Carinthia     |                              | 2/63       | 1  | -  | 1   |
|               | Molz bichl (Mo)              | 1/20       | 1  | -  | -   |
|               | Drobollach am Faakersee (Dr) | 1/22       | -  | -  | 1   |
|               | St.Paul im Lavantal (SPL)    | -/21       | -  | -  | -   |
|               |                              | 2/60       | -  | -  | 2   |
| Vienna        |                              | 1/30       | -  | -  | 1   |
|               | Prater/Lusthaus (P)          | 1/30       | -  | -  | 1   |
|               | Lainzer Tiergarten (L)       | 1/30       | -  | -  | 1   |

Abbreviations: Bm, *B. microti*; Bd, *B. divergens*; Bve, *B. venatorum*

**TABLE S4. Microorganisms detected in nymphal and adult tick stages**

| Province        | Tick stage | No. of ticks | Bor | Rick | Bab | CNM | Ap |
|-----------------|------------|--------------|-----|------|-----|-----|----|
| Styria          | Nymphs     | 41           | 10  | 4    | 1   | 2   | -  |
|                 | Adults     | 21           | 7   | 3    | -   | -   | -  |
| Salzburg        | Nymphs     | 46           | 10  | 7    | -   | 1   | -  |
|                 | Adults     | 16           | 6   | -    | 2   | -   | -  |
| Lower Austria   | Nymphs     | 41           | 6   | 10   | -   | 1   | -  |
|                 | Adults     | 23           | 6   | 2    | 1   | 1   | -  |
| Burgenland      | Nymphs     | 58           | 14  | 3    | -   | 3   | -  |
|                 | Adults     | 2            | -   | 1    | -   | -   | -  |
| Vorarlberg      | Nymphs     | 37           | 7   | 8    | 2   | 2   | -  |
|                 | Adults     | 25           | 14  | 1    | 1   | -   | -  |
| Tyrol           | Nymphs     | 48           | 14  | 1    | 2   | 4   | -  |
|                 | Adults     | 13           | 3   | 2    | -   | 1   | -  |
| Upper Austria   | Nymphs     | 40           | 10  | 4    | 2   | 2   | 1  |
|                 | Adults     | 20           | 7   | 2    | -   | 2   | -  |
| Carinthia       | Nymphs     | 34           | 5   | 5    | -   | -   | 2  |
|                 | Adults     | 29           | 7   | 10   | 2   | -   | -  |
| Vienna          | Nymphs     | 37           | 9   | 11   | 1   | 2   | 1  |
|                 | Adults     | 23           | 7   | 19   | 1   | 3   | -  |
| Total (Austria) | Nymphs     | 382          | 85  | 53   | 8   | 17  | 4  |
|                 | Adults     | 172          | 57  | 40   | 7   | 7   | -  |

Abbreviations: Bor, *B. burgdorferi* sl; Rick, *Rickettsia* spp.; Bab, *Babesia* spp.; CNM,

*Candidatus* Neoehrlichia mikurensis; Ap, *A. phagocytophilum*

**TABLE S5. Co-infections with two different microorganism genera (n=37 ticks) <sup>a</sup>**

| Genus   | Species | Bor | Bbss | Ba  | Bg/Bbav | Bl  | Bv  | Bsp | Rick | Rh  | Rr  | Rm  | Rs  | Rsp. | Bab | Bve | Bd  | Bm  | Ana/Ehr | Ap  | CNM |
|---------|---------|-----|------|-----|---------|-----|-----|-----|------|-----|-----|-----|-----|------|-----|-----|-----|-----|---------|-----|-----|
| Bor     |         | n/a | n/a  | n/a | n/a     | n/a | n/a | n/a | 22   | 8   | 10  | -   | 1   | 3    | 4   | 4   | -   | -   | 6       | 1   | 5   |
|         | Bbss    | n/a | n/a  | n/a | n/a     | n/a | n/a | n/a | 4    | 1   | 2   | -   | 1   | -    | 2   | 2   | -   | -   | 2       | 1   | 1   |
|         | Ba      | n/a | n/a  | n/a | n/a     | n/a | n/a | n/a | 13   | 8   | 3   | -   | -   | 2    | 2   | 2   | -   | -   | 4       | 1   | 3   |
|         | Bg/Bbav | n/a | n/a  | n/a | n/a     | n/a | n/a | n/a | 4    | -   | 4   | -   | -   | -    | -   | -   | -   | -   | -       | -   | -   |
|         | Bl      | n/a | n/a  | n/a | n/a     | n/a | n/a | n/a | 1    | 1   | -   | -   | -   | -    | -   | -   | -   | -   | -       | -   | -   |
|         | Bv      | n/a | n/a  | n/a | n/a     | n/a | n/a | n/a | 6    | 1   | 3   | -   | -   | 2    | 1   | 1   | -   | -   | 1       | -   | 1   |
|         | Bsp     | n/a | n/a  | n/a | n/a     | n/a | n/a | n/a | 1    | -   | -   | -   | -   | 1    | -   | -   | -   | -   | -       | -   | -   |
| Rick    |         | 22  | 4    | 13  | 4       | 1   | 6   | 1   | n/a  | n/a | n/a | n/a | n/a | n/a  | 3   | 1   | -   | 2   | -       | -   | -   |
|         | Rh      | 8   | 1    | 8   | -       | 1   | 1   | -   | n/a  | n/a | n/a | n/a | n/a | n/a  | 1   | -   | -   | 1   | -       | -   | -   |
|         | Rr      | 10  | 2    | 3   | 4       | -   | 3   | -   | n/a  | n/a | n/a | n/a | n/a | n/a  | 1   | -   | -   | 1   | -       | -   | -   |
|         | Rm      | -   | -    | -   | -       | -   | -   | -   | n/a  | n/a | n/a | n/a | n/a | n/a  | -   | -   | -   | -   | -       | -   | -   |
|         | Rs      | 1   | 1    | -   | -       | -   | -   | 1   | n/a  | n/a | n/a | n/a | n/a | n/a  | -   | -   | -   | -   | -       | -   | -   |
|         | Rsp.    | 3   | -    | 2   | -       | -   | 2   | -   | n/a  | n/a | n/a | n/a | n/a | n/a  | 1   | 1   | -   | -   | -       | -   | -   |
| Bab     |         | 4   | 2    | 2   | -       | -   | 1   | -   | 3    | 1   | 1   | -   | -   | 1    | n/a | n/a | n/a | n/a | 2       | -   | 2   |
|         | Bve     | 4   | 2    | 2   | -       | -   | 1   | -   | 1    | -   | -   | -   | -   | 1    | n/a | n/a | n/a | n/a | 1       | -   | 1   |
|         | Bd      | -   | -    | -   | -       | -   | -   | -   | -    | -   | -   | -   | -   | -    | n/a | n/a | n/a | n/a | 1       | -   | 1   |
|         | Bm      | -   | -    | -   | -       | -   | -   | -   | 2    | 1   | 1   | -   | -   | -    | n/a | n/a | n/a | n/a | -       | -   | -   |
| Ana/Ehr |         | 6   | 2    | 4   | -       | -   | 1   | -   | -    | -   | -   | -   | -   | -    | 2   | 1   | 1   | -   | n/a     | n/a | n/a |
|         | Ap      | 1   | 1    | 1   | -       | -   | -   | -   | -    | -   | -   | -   | -   | -    | -   | -   | -   | -   | n/a     | n/a | n/a |
|         | CNM     | 5   | 1    | 3   | -       | -   | 1   | -   | -    | -   | -   | -   | -   | -    | 2   | 1   | 1   | -   | n/a     | n/a | n/a |

<sup>a</sup> the three detected triple-infections are excluded from this table; n/a not applicable

Abbreviations: Bor, *Borrelia* spp.; Bbss, *B. burgdorferi* sensu stricto; Ba, *B. afzelii*; Bg/Bbav, *B. garinii/B. bavariensis*; Blus, *B. lusitaniae*; Bv, *B. valaisiana*; Bsp, *B. spielmanii*; Rick, *Rickettsia* spp.; Rh, *R. helvetica*; Rr, *R. raoultii*; Rm, *R. monacensis*; Rs, *R. slovaca*; Rsp., unidentified *Rickettsia* spp.; Bab, *Babesia* spp.; Bve, *B. venatorum*; Bd, *B. divergens*; Bm, *B. microti*; Ap, *A. phagocytophilum*; CNM, *Candidatus N. mikurensis*
